# Supplementary material for: AAV1 is the optimal viral vector for optogenetic experiments in pigeons (Columba livia)
Source: PubMed Central journal article supplement (PMC7822860; doi:10.1038/s42003-020-01595-9), 2021-01-22
Supplement: 42003_2020_1595_MOESM3_ESM.pdf [file 42003_2020_1595_MOESM3_ESM.pdf]

## Description of Additional Supplementary Files

**File Name:** Supplementary Data 1

**Description:** Source data underlying the main text figures.
